# Supplementary material for: Effectiveness of the Triple P Program on Parental Stress and Self-efficacy in the Context of a Community Roll-out
Source: Springer Nature journal article supplement (doi:10.1007/s10826-023-02663-4), 2023-09-09
Supplement: MOESM1 [file 26025692]

**Supplementary file – details on the content of the Triple P program (levels 3-4)**

The Triple P program helps parents acquire or perfect various parenting strategies and skills (positive parenting practices) that allow parents to: (1) develop positive relationships with their children, (2) encourage desirable behavior, (3) teach children new skills and behaviors, and (4) manage misbehaviors. The entire intervention system comprises 5 levels, whose interventions come in different variants and modalities. The following specific interventions are the focus of our study:

| **Intervention** | **Target Population** | **Intervention Methods** |
| --- | --- | --- |
| **Level 3** *Primary Care Triple P*  Narrow focus parent training | Parents with specific concerns who require consultations or active-skills training. | Brief program (about 80 minutes over four sessions) combining advice, rehearsal and self-evaluation to teach parents to manage a discrete child problem behavior. May involve telephone contact. |
| **Level 4** *Group Triple P*  Broad focus parent training | Parents wanting intensive training in positive parenting skills. Typically, parents of children with behavior problems such as aggressive or oppositional behavior. | Broad focus program (about 10 hours over 8 sessions) focusing on parent–child interaction and the application of parenting skills to a broad range of target behaviors. Includes generalization-enhancement strategies. Involve telephone and group sessions. |

**Summary of sessions content – Primary Care Triple P (Level 3)**

** Session goals and agenda are proposed at the beginning of each session and consent is obtained from the parent/s.*

Session 1

Welcome and self-introduction; conduct intake interview on child’s behavior, development and health, educational history, and family relationships; ascertain the appropriateness of Primary Care Triple P for the family and discuss referral if appropriate; identify a target child behavior and devise a system for monitoring this behavior; assign and explain homework (monitor target behavior/s).

Session 2

Discuss causes of child behavior problems and develop specific goals for change; develop a parenting plan; explain homework tasks (continue to monitor target behavior/s; implement and monitor parenting plan; practice specific skills).

Session 3

Review monitoring of the target behavior/s (try to link changes in child behavior to changes in parenting strategies used); review implementation of the parenting plan, ask what worked; discuss any other issues the parent/s want to cover; explain homework tasks (continue to monitor target behavior/s; continue to implement parenting plan/s; other personal goals for practice)

Session 4

Review monitoring of the target behavior/s and implementation of the parenting plan/s (as in session 3); check for any obstacles to implementation of the parenting plan/s and develop a coping plan; ask the parent/s what improvements they have seen since starting the program, and what further improvements they would like to see in their own and their child’s behavior; discuss ways of maintaining progress made; discuss any other issues the parent/s want to cover; discuss referral options as appropriate; congratulate and thank the parent/s for their participation.

**Summary of sessions content – Group Triple P (level 4)**

Group session 1: Positive parenting

This session provides parents with an introduction to positive parenting, why children behave as they do, and how to set goals for change. Parents submit a completed assessment booklet at the beginning of this session.

Group session 2: Helping children develop

During this session, the practitioner discusses how to develop good relationships with children, how to encourage good behavior, and four strategies for how parents can teach their children new skills and behaviors.

Group session 3: Managing misbehavior

During this session, the practitioner offers additional strategies to assist parents with managing misbehavior during this session. Parents will also learn to develop parenting routines to promote compliance and manage non-compliance from their children. They have an opportunity to rehearse these routines during the session.

Group session 4: Planning ahead

This session covers family survival tips, identifying high-risk situations that still cause concern, and how to develop planning ahead routines to promote good child behavior in high-risk situations (e.g., shopping, learning how to take turns, fighting with siblings, getting ready for school). Parents also prepare for their individual consultations during this session.

Telephone session 5-7: Using positive parenting strategies

The practitioner provides feedback from initial assessments that the family completed and then uses the self-regulatory feedback model to help parents review their implementation of planning ahead routines for their high-risk situations. From this, parents set goals for further refinement of their routines, if needed.

Session 8: Program close

Parents return for a final group session to review progress, look at ways to maintain changes and plan for the future, and to close the program. If necessary, referral options are discussed. Occasionally, this session can also be offered by telephone.

**What are the positive parenting practices taught by Triple P?**

Within all Triple P interventions, 17 parenting strategies or skills (positive parenting practices) can be taught to the parent. Typically, Level 3 interventions focus on a few strategies that the parent needs to implement their parenting plan. Level 4 interventions teach all of the strategies and invite the parent to adopt those that best suit their style and situation.

For developing positive relationships:

- Spending quality time with children – spend frequent, brief amounts of time in activities that the child is interested in
- Talking to children – have conversations with children about their activities or interests
- Showing affection – provide physical affection (e.g. hugging, cuddling, tickling, etc.)

For encouraging desirable behavior:

- Using descriptive praise – provide encouragement by describing the behavior or the action that is appreciated
- Giving attention – provide positive non-verbal attention (e.g. smile, wink, pat on the back, etc.)
- Providing engaging activities – provide interesting, engaging and age-appropriate activities and materials

For teaching new skills and behaviors:

- Setting a good example – model (demonstrate) the behaviors that you want children to learn
- Using incidental teaching – use questions and prompts to respond to child-initiated interactions and promote learning
- Using Ask, Say, Do – use verbal and physical prompts to teach new skills
- Using behavior charts – use a chart to set goals and reinforce skill development

For managing misbehavior, or challenging behaviors:

- Ground rules – establish fair, specific and enforceable rules
- Directed discussion – identify and rehearse the appropriate behavior
- Planned ignoring – intentionally ignore a problem behavior instead of reacting or giving negative attention to the child
- Clear, calm instructions – give a clear instruction to start a new task, or to stop a problem behavior and start the appropriate alternative behavior
- Logical consequences – remove the activity or privilege at the center of a problem for a brief, set amount of time; return the activity or privilege so the child can try again
- Quiet time – when a problematic or serious behavior occurs and the above strategies have not worked, move the child to the edge of the activity for a brief, set amount of time; return child to activity when s/he is calm so s/he can try again
- Time out – when the problematic or serious behavior continues and the above strategies haven’t worked, move child to an area away from others for a brief, set amount of time; return child to activity when s/he is calm so s/he can try again.
